# Supplementary material for: Asymmetry in the function and dynamics of the cytosolic group II chaperonin CCT/TRiC
Source: PLOS journal article supplement (doi:10.1371/journal.pone.0176054), 2017-05-02
Supplement: S3 (10.1371/journal.pone.0176054.s003) [file journal.pone.0176054.s003]

### S3 Fig. ATP binding sites of CtCCT subunits

(A)

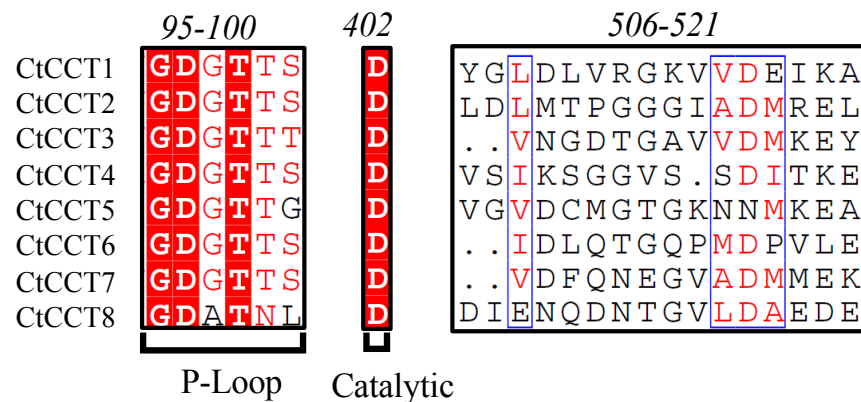

(B)

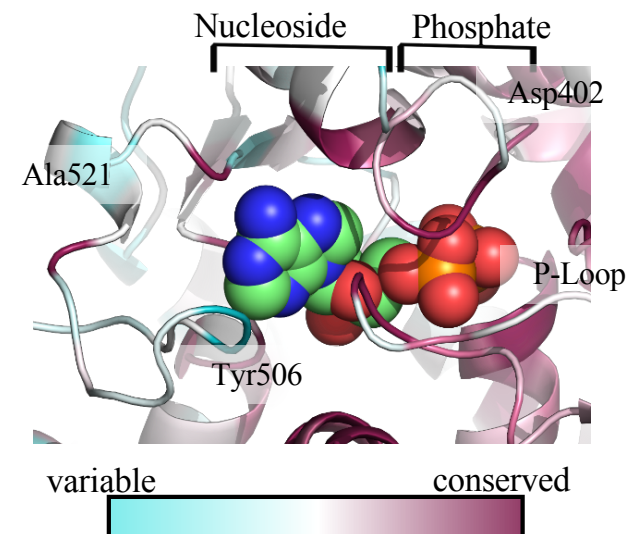

- (A) Alignment of the amino acid in ATP binding site across the eight subunits that comprise the CtCCT. The numbering refer to the ctCCT1 sequence
- (B) CtCCT1 active site colored according to conservation scores calculated for CtCCT1 – CtCCT8
